# Supplementary material for: The Induced Expression of BPV E4 Gene in Equine Adult Dermal Fibroblast Cells as a Potential Model of Skin Sarcoid-like Neoplasia
Source: MDPI journal article supplement (doi:10.3390/ijms23041970), 2022-02-10
Supplement: s1 [file s1]

Supplementary Table S1. The primer sequences used in real-time PCR analysis.

| <i>Gene Name</i> | <i>Accession Number</i>   | <i>Primers</i>                                     | <i>Primer's Location</i> | <i>Product Length [bp]</i> |
|------------------|---------------------------|----------------------------------------------------|--------------------------|----------------------------|
| <i>FGF10</i>     | <b>ENSECAG00000014361</b> | F: GAGATGTCCGCTGGAGAAAG<br>R: TGCTGTTAATGGCTTTGACG | Exon 1 - 2               | 162                        |
| <i>MMP2</i>      | <b>ENSECAG00000000953</b> | F: TCCCTTTCCTCTTCAACGGC<br>R: CCGTATTTGCCGTCCTTGTC | Exon 4                   | 112                        |
| <i>MMP9</i>      | <b>ENSECAG00000013081</b> | F: CGTGTTTCCCTTCACCTTCG<br>R: GGTCGTAGTTGGCGGTAGT  | Exon 6                   | 101                        |
| <i>MMP14</i>     | <b>ENSECAG00000008351</b> | F: CATGATCTTCTTCGCTGAGGG<br>R: GGTGTCGCCTCCAATGTTG | Exon 4                   | 109                        |
| <i>MMP15</i>     | <b>ENSECAG00000000196</b> | F: AGAAGGAGGCCGACATCATG<br>R: CCAGGGAAATAGGCGTGGG  | Exon 5                   | 103                        |
| <i>MMP17</i>     | <b>ENSECAG00000013201</b> | F: CACTACGCCCTCAAAGTCTG<br>R: AGGGATAGCGGTCATTGTGG | Exon 4                   | 118                        |
| <i>MMP24</i>     | <b>ENSECAG00000024778</b> | F: TGAGCTGGACACACGGAAA<br>R: TGCCTCTTTCCGGTCACTTT  | Exon 4                   | 115                        |
| <i>PTGER2</i>    | <b>ENSECAG00000009713</b> | F: GTCTGCTCCTTGCCTTTCAC<br>R: AAGACCCAGGGGTCGATAAT | Exon 1 -2                | 122                        |
| <i>RECK</i>      | <b>ENSECAG00000010426</b> | F: GCAGAACGGACGCACTTAC<br>R: GGGCAGGGGTTAGGATTACA  | Exon 17                  | 117                        |
| <i>TIMP1</i>     | <b>ENSECAG00000014259</b> | F: CAACCAGACCACCTTACAGC<br>R: ACAAACCAGGTGTCAGGGG  | Exon 2 - 3               | 96                         |
